# Supplementary material for: Personality traits associate with behavioral problems in pet dogs
Source: PubMed Central journal article supplement (PMC8866408; doi:10.1038/s41398-022-01841-0), 2022-02-23
Supplement: 41398_2022_1841_MOESM1_ESM.pdf [file 41398_2022_1841_MOESM1_ESM.pdf]

## **Personality traits associate with behavioral problems in pet dogs**

Milla Salonen, PhD<sup>1,2,3\*</sup>, Salla Mikkola, MSc<sup>1,2,3</sup>, Emma Hakanen, MSc<sup>1,2,3</sup>, Sini Sulkama, MSc<sup>1,2,3</sup>, Jenni Puurunen, PhD<sup>1,2,3</sup>, Hannes Lohi, PhD, prof.<sup>1,2,3</sup>

<sup>1</sup>Department of Veterinary Biosciences, University of Helsinki, Helsinki, Finland

<sup>2</sup>Department of Medical and Clinical Genetics, University of Helsinki, Helsinki, Finland

<sup>3</sup>Folkhälsan Research Center, Helsinki, Finland

\* Corresponding author:

Milla Salonen, postdoctoral researcher

Biomedicum Helsinki

P.O.Box 63 (Haartmaninkatu 8),

FI-00014 University of Helsinki, Finland

Phone: +358 2941 25602

Email: [milla.ahola@helsinki.fi](mailto:milla.ahola@helsinki.fi)

Supplementary Table S1. Personality and unwanted behavior factors and their content.

| <b>Section</b>               | <b>Trait</b>                 | <b>Description</b>                                                                                                                                                                                                                                                                  |
|------------------------------|------------------------------|-------------------------------------------------------------------------------------------------------------------------------------------------------------------------------------------------------------------------------------------------------------------------------------|
| Personality                  | Insecurity                   | Describes the dog's insecure and fearful tendencies. Highest loading items: insecure, anxious, bold (negative), confident (negative).                                                                                                                                               |
|                              | Training focus               | Describes the dog's tendency to be focused, obedient, and calm. Highest loading items: focused, distractible (negative), obedient, patient.                                                                                                                                         |
|                              | Energy                       | Describes the dog's tendency to be energetic and playful. Highest loading items: energetic, lazy (negative), slow (negative), active.                                                                                                                                               |
|                              | Aggressiveness/<br>dominance | Describes the dog's tendency to show aggressive and dominant behaviors toward other dogs. Highest loading items: aggressive to dogs of the same gender, dominant, aggressive to dogs of the opposite gender, submissive (negative).                                                 |
|                              | Human sociability            | Describes the dog's tendency to social behavior with people. Highest loading items: sociable with people, affectionate with people, human oriented (prefers the company of people more than the company of other dogs).                                                             |
|                              | Dog sociability              | Describes the dog's tendency to social behavior with other dogs. Highest loading items: indifferent (negative), playful with dogs, sociable with dogs of opposite gender, human oriented (negative).                                                                                |
|                              | Perseverance                 | Describes the dog's tendency to show persevering and stubborn behavior. Highest loading items: persevering, decisive, stubborn.                                                                                                                                                     |
| Noise sensitivity            | Noise sensitivity            | Describes the dog's fearful reactions toward fireworks, thunder, gunshot, and other noises. Highest loading items: trembles when hears thunder, trembles when hears fireworks, tail low or between legs when hears fireworks.                                                       |
| Fearfulness                  | Fearfulness                  | Describes the dog's fearful reactions towards unfamiliar people and dogs and in a new place or situation. Highest loading items: withdraws when a stranger approaches, moves away if the stranger tries to touch, is suspicious of strangers.                                       |
| Aggression                   | Barking                      | Describes the dog's vocal reactions to unfamiliar people. Highest loading items: barks when a stranger tries to touch (at home), barks when a stranger comes in, barks when a stranger tries to touch (when leashed)                                                                |
|                              | Stranger directed aggression | Describes the dog's aggressive reactions towards unfamiliar people. Highest loading items: tries to snap/bite when a stranger tries to touch (when leashed), tries to snap/bite when a stranger tries to touch (at home).                                                           |
|                              | Owner directed aggression    | Describes the dog's aggressive reactions towards the owner, specifically when handled or when the owner approaches a resource. Highest loading items: tries to snap/bite when the owners tries to take away bone/food/toy, growls when the owners tries to take away bone/food/toy. |
|                              | Dog directed aggression      | Describes the dog's aggressive reactions towards other dogs, both when meeting unfamiliar dogs and when familiar dogs approach a resource. Highest loading items: growls when meets unfamiliar dogs, tries to attack when meets unfamiliar dogs.                                    |
| Fear of surfaces/<br>heights | Fear of surfaces/<br>heights | Describes the dog's difficulties to walk on different surfaces and in high places. Highest loading items: difficulties walking on shiny floors, difficulties walking on a slippery floor.                                                                                           |

|                             |                             |                                                                                                                                                                                                                                                                    |
|-----------------------------|-----------------------------|--------------------------------------------------------------------------------------------------------------------------------------------------------------------------------------------------------------------------------------------------------------------|
| Separation-related behavior | Separation-related behavior | Describes the dog's reactions to being left alone (without people) and its behavior when people are leaving. Highest loading items: pants when owner is leaving, pants when home alone, salivates when owner is leaving.                                           |
| Impulsivity/inattention     | Inattention                 | Describes the dog's inability to concentrate. Highest loading items: difficulty to concentrate on a task/play, easy to attract the dog's attention but it loses interest soon, difficulties learning as the dog is careless or other things attract its attention. |
|                             | Hyperactivity/impulsivity   | Describes the dog's impulsive reactions and excessive activity. Highest loading items: dog cannot be quiet or easily calmed, dog fidgets all the time, dog is excessive and difficult to control.                                                                  |

Supplementary Table S2. Descriptive statistics of categorical variables. Categorical variables did not have missing data.

| Category                           | Variable    | Level                        | N    | %    |
|------------------------------------|-------------|------------------------------|------|------|
| Covariate                          | Sex         | Male                         | 5380 | 47.4 |
|                                    |             | Female                       | 5980 | 52.6 |
|                                    | Breed group | Australian Shepherd          | 273  | 2.4  |
|                                    |             | Belgian shepherd dogs        | 193  | 1.7  |
|                                    |             | Bernese Mountain Dogs        | 151  | 1.3  |
|                                    |             | Bichon type dogs             | 204  | 1.8  |
|                                    |             | Border Collie                | 450  | 4.0  |
|                                    |             | Brachycephalic dogs          | 173  | 1.5  |
|                                    |             | Bull type terriers           | 169  | 1.5  |
|                                    |             | Chinese Crested Dog          | 126  | 1.1  |
|                                    |             | Collie Rough                 | 181  | 1.6  |
|                                    |             | Collie Smooth                | 142  | 1.2  |
|                                    |             | Dachshunds                   | 158  | 1.4  |
|                                    |             | English herders              | 200  | 1.8  |
|                                    |             | European sighthounds         | 188  | 1.7  |
|                                    |             | Fighting dogs                | 153  | 1.3  |
|                                    |             | Finnish Lapponian Dog        | 475  | 4.2  |
|                                    |             | German Shepherd Dog          | 423  | 3.7  |
|                                    |             | German spitz related breeds  | 325  | 2.9  |
|                                    |             | Golden Retriever             | 189  | 1.7  |
|                                    |             | Hunting terriers             | 336  | 3.0  |
|                                    |             | Jack Russell Terrier         | 161  | 1.4  |
|                                    |             | Asian primitive dogs         | 218  | 1.9  |
|                                    |             | Labrador Retriever           | 373  | 3.3  |
|                                    |             | Lagotto Romagnolo            | 190  | 1.7  |
|                                    |             | Lapponian Herder             | 178  | 1.6  |
|                                    |             | Livestock guardian dogs      | 95   | 0.8  |
|                                    |             | Mastiff type dogs            | 276  | 2.4  |
|                                    |             | Middle European herders      | 238  | 2.1  |
|                                    |             | Middle European utility dogs | 385  | 3.4  |
|                                    |             | Miniature Pinscher           | 131  | 1.2  |
|                                    |             | Miniature Schnauzer          | 164  | 1.4  |
| Mixed breed                        | 379         | 3.3                          |      |      |
| Northern companion spitz           | 178         | 1.6                          |      |      |
| Northern hunting spitz             | 139         | 1.2                          |      |      |
| Nova Scotia Duck Tolling Retriever | 123         | 1.1                          |      |      |
| Other breed                        | 94          | 0.8                          |      |      |

|                            |     |     |
|----------------------------|-----|-----|
| Other companion dogs       | 277 | 2.4 |
| Parson type terriers       | 150 | 1.3 |
| Pinschers Schnauzers       | 145 | 1.3 |
| Pointers                   | 250 | 2.2 |
| Poodles                    | 233 | 2.1 |
| Primitive sighthounds      | 302 | 2.7 |
| Retrievers & flushing dogs | 458 | 4.0 |
| Scenthounds                | 94  | 0.8 |
| Schapendoes                | 104 | 0.9 |
| Shetland Sheepdog          | 279 | 2.5 |
| Sled dogs                  | 137 | 1.2 |
| Spanish Water Dog          | 231 | 2.0 |
| Teacup dogs                | 129 | 1.1 |
| Welsh Corgis               | 127 | 1.1 |
| Whippet                    | 175 | 1.5 |
| White Swiss Shepherd Dog   | 150 | 1.3 |
| Yard terriers              | 288 | 2.5 |

---

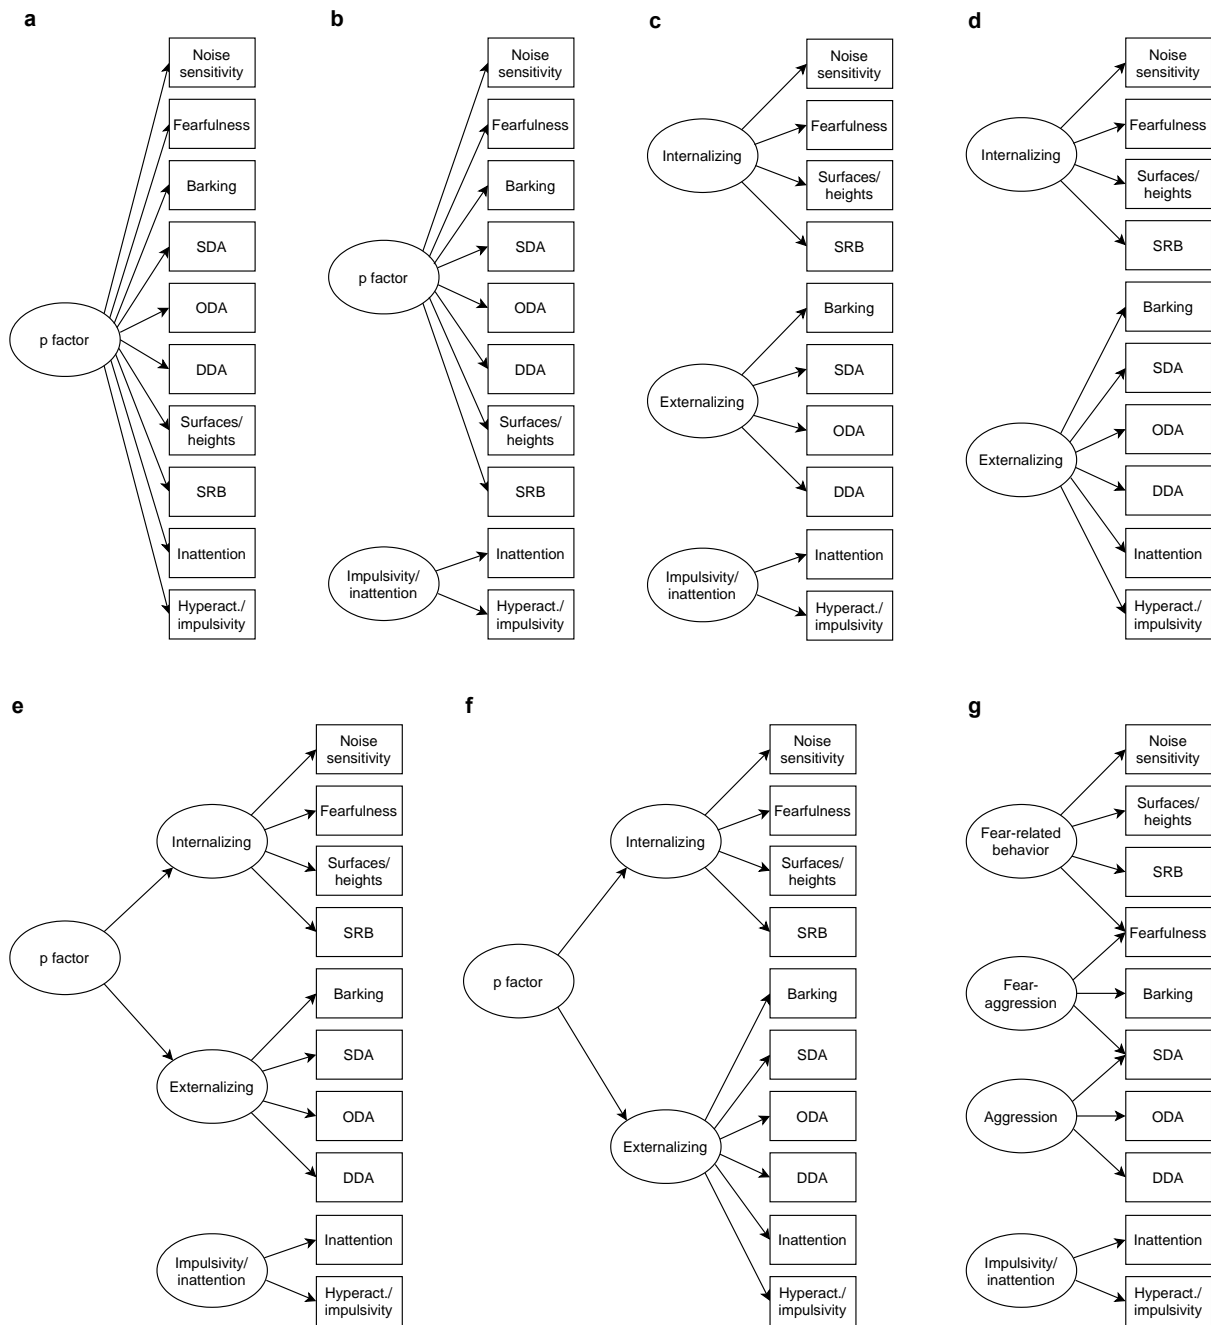

Supplementary Figure S1. Competing CFA models based on previous literature. These models were compared with each other and to a null model, which only included the variances of the observed variables. a) p factor model; b) p factor model and impulsivity/inattention; c) internalizing, externalizing, and impulsivity/inattention; d) internalizing and externalizing behavior, e) hierarchical model and impulsivity/inattention; f) hierarchical model; g) dog behavior model. Surfaces/heights = fear of surfaces/heights; SRB = separation-related behavior; SDA = stranger directed aggression; ODA = owner directed aggression, DDA = dog directed aggression; Hyperact./impulsivity = hyperactivity/impulsivity.

Supplementary Table S3. Socialization item loadings.

| Item                               | Loading |
|------------------------------------|---------|
| Met unfamiliar men                 | 0.83    |
| Met unfamiliar women               | 0.85    |
| Met unfamiliar children            | 0.46    |
| Met unfamiliar dogs                | 0.71    |
| Visited city center                | 0.64    |
| Travelled by car                   | 0.39    |
| Travelled by public transportation | 0.44    |

Cronbach's alpha = 0.71, Guttman's lambda 6 = 0.72.

Supplementary Table S4. Descriptive statistics of continuous variables.

| Category                        | Variable                           | Range         | Mean  | SD   | % missing |
|---------------------------------|------------------------------------|---------------|-------|------|-----------|
| Covariate                       | Age                                | 0.18 - 17.48  | 5.21  | 3.43 | 0.00      |
|                                 | Socialization score                | -3.94 - 2.91  | 0.00  | 1.00 | 17.7      |
| Personality trait               | Insecurity score                   | -1.65 - 4.04  | -0.01 | 1.00 | 0.00      |
|                                 | Training focus score               | -4.87 - 2.48  | 0.01  | 1.01 | 0.00      |
|                                 | Energy score                       | -3.94 - 2.17  | -0.01 | 1.00 | 0.00      |
|                                 | Aggressiveness/dominance score     | -1.59 - 4.00  | 0.00  | 1.00 | 0.00      |
|                                 | Human sociability score            | -4.91 - 1.83  | -0.01 | 1.00 | 0.00      |
|                                 | Dog sociability score              | -3.18 - 2.28  | 0.00  | 0.99 | 0.00      |
| Unwanted behavior trait         | Perseverance score                 | -4.16 - 3.8   | -0.01 | 1.00 | 0.00      |
|                                 | Noise sensitivity score            | -1.36 - 8.75  | -0.03 | 1.16 | 12.1      |
|                                 | Fearfulness score                  | -1.51 - 4.84  | -0.02 | 1.07 | 6.5       |
|                                 | Barking score                      | -1.39 - 4.73  | 0.00  | 0.99 | 7.3       |
|                                 | Stranger directed aggression score | -1.41 - 8.06  | -0.01 | 0.96 | 7.3       |
|                                 | Owner directed aggression score    | -0.96 - 10.29 | -0.02 | 0.97 | 7.3       |
|                                 | Dog directed aggression score      | -2.29 - 5.10  | -0.01 | 0.99 | 7.3       |
|                                 | Fear of surfaces/heights score     | -0.69 - 6.20  | 0.00  | 1.09 | 18.6      |
|                                 | Separation-related behavior score  | -0.63 - 13.23 | -0.01 | 1.12 | 13.2      |
| Inattention score               | -1.81 - 4.44                       | -0.01         | 0.99  | 10.3 |           |
| Hyperactivity/impulsivity score | -1.65 - 4.88                       | -0.01         | 0.99  | 10.3 |           |

Supplementary Table S5. Model fit of competing CFA models. CFI = comparative fit index; TLI = Tucker-Lewis index; AIC = Akaike information criterion; BIC = Bayesian information criterion; RMSEA = root mean square error of approximation; SRMR = standardized root mean square residual.

| Tested CFA model                         | Split-sample dataset | CFI   | TLI   | AIC    | BIC    | RMSEA | SRMR  |
|------------------------------------------|----------------------|-------|-------|--------|--------|-------|-------|
| Null model                               | Dataset 1            | 0     | 0     | 147333 | 147402 | 0.194 | 0.191 |
|                                          | Dataset 2            | 0     | 0     | 148911 | 148981 | 0.204 | 0.207 |
| p factor model                           | Dataset 1            | 0.622 | 0.514 | 141351 | 141455 | 0.135 | 0.091 |
|                                          | Dataset 2            | 0.666 | 0.571 | 141832 | 141936 | 0.134 | 0.087 |
| p factor model + impulsivity/inattention | Dataset 1            | 0.836 | 0.782 | 139299 | 139407 | 0.091 | 0.064 |
|                                          | Dataset 2            | 0.842 | 0.791 | 139960 | 140068 | 0.093 | 0.063 |
|                                          | Dataset 1            | 0.870 | 0.817 | 138972 | 139087 | 0.083 | 0.056 |

|                                                        |           |       |       |        |        |       |       |
|--------------------------------------------------------|-----------|-------|-------|--------|--------|-------|-------|
| Internalizing, externalizing & impulsivity/inattention | Dataset 2 | 0.881 | 0.833 | 139543 | 139657 | 0.083 | 0.055 |
| Internalizing & externalizing                          | Dataset 1 | 0.651 | 0.538 | 141074 | 141182 | 0.132 | 0.089 |
|                                                        | Dataset 2 | 0.700 | 0.603 | 141470 | 141577 | 0.129 | 0.085 |
| Hierarchical model & impulsivity/inattention           | Dataset 1 | 0.870 | 0.817 | 138972 | 139087 | 0.083 | 0.056 |
|                                                        | Dataset 2 | 0.881 | 0.833 | 139543 | 139657 | 0.083 | 0.055 |
| Hierarchical model                                     | Dataset 1 | 0.651 | 0.524 | 141076 | 141187 | 0.134 | 0.089 |
|                                                        | Dataset 2 | 0.700 | 0.591 | 141472 | 141583 | 0.131 | 0.085 |
| Dog behavior model                                     | Dataset 1 | 0.955 | 0.925 | 138159 | 138290 | 0.053 | 0.033 |
|                                                        | Dataset 2 | 0.955 | 0.925 | 138763 | 138895 | 0.056 | 0.034 |

Supplementary Table S6. Comparison of models in dataset 1. Grey cell: column model obtained better fit. Italicized text: row model obtained better fit. LR: Likelihood ratio.

|                                                                   | Dog behavior model            | Hierarchical model           | Hierarchical model & impulsivity/inattention | Internalizing & externalizing | Internalizing, externalizing & impulsivity/inattention | p factor model & impulsivity/inattention | p factor model                |
|-------------------------------------------------------------------|-------------------------------|------------------------------|----------------------------------------------|-------------------------------|--------------------------------------------------------|------------------------------------------|-------------------------------|
| <b>Null model</b>                                                 | LR = 9209.88,<br>p = 1.66e-08 | LR = 6280.37,<br>p < 2e-16   | LR = 8386.39,<br>p = 3.67e-09                | LR = 6280.37,<br>p < 2e-16    | LR = 8386.39,<br>p = 3.67e-09                          | LR = 8055.45,<br>p < 2e-16               | LR = 6001.72,<br>p = 3.01e-09 |
| <b>p factor model</b>                                             | LR = 3208.16,<br>p < 2e-16    | LR = 278.65,<br>p = 1.03e-08 | LR = 2384.67,<br>p < 2e-16                   | LR = 278.65,<br>p = 1.03e-08  | LR = 2384.67,<br>p < 2e-16                             | LR = 2053.73,<br>p = 8.19e-09            |                               |
| <b>p factor model &amp; impulsivity/inattention</b>               | LR = 1154.43,<br>p < 2e-16    | LR = 1775.08,<br>p = 2.2e-08 | LR = 330.94,<br>p < 2e-16                    | LR = 1775.08,<br>p = 2.2e-08  | LR = 330.94,<br>p < 2e-16                              |                                          |                               |
| <b>Internalizing, externalizing &amp; impulsivity/inattention</b> | LR = 823.49,<br>p = 2.75e-08  | LR = 2106.02,<br>p < 2e-16   | indistinguishable                            | LR = 2106.02,<br>p < 2e-16    |                                                        |                                          |                               |
| <b>Internalizing &amp; externalizing</b>                          | LR = 2929.51,<br>p < 2e-16    | indistinguishable            | LR = 2106.02,<br>p < 2e-16                   |                               |                                                        |                                          |                               |
| <b>Hierarchical model &amp; impulsivity/inattention</b>           | LR = 823.49,<br>p = 2.75e-08  | LR = 2106.02,<br>p < 2e-16   |                                              |                               |                                                        |                                          |                               |
| <b>Hierarchical model</b>                                         | LR = 2929.51,<br>p < 2e-16    |                              |                                              |                               |                                                        |                                          |                               |



Supplementary Table S7. Comparison of models in dataset 2. Grey cell: column model obtained better fit. Italicized text: row model obtained better fit. LR: Likelihood ratio.

|                                                                   | Dog behavior model             | Hierarchical model                    | Hierarchical model & impulsivity/inattention | Internalizing, externalizing & impulsivity/inattention | p factor model & impulsivity/inattention | p factor model                |
|-------------------------------------------------------------------|--------------------------------|---------------------------------------|----------------------------------------------|--------------------------------------------------------|------------------------------------------|-------------------------------|
| <b>Null model</b>                                                 | LR = 10183.93,<br>p = 2.65e-09 | LR = 7463.25,<br>p < 2e-16            | LR = 9394.39,<br>p = 5.98e-10                | LR = 7463.25,<br>p < 2e-16                             | LR = 9394.39,<br>p = 5.98e-10            | LR = 7099.55,<br>p < 2e-16    |
| <b>p factor model</b>                                             | LR = 3084.38,<br>p < 2e-16     | LR = 363.70,<br>p < 2e-16             | LR = 2294.84,<br>p < 2e-16                   | LR = 363.70,<br>p < 2e-16                              | LR = 2294.84,<br>p < 2e-16               | LR = 1873.63,<br>p = 2.65e-08 |
| <b>p factor model &amp; impulsivity/inattention</b>               | LR = 1210.76,<br>p < 2e-16     | <i>LR = 1509.92,<br/>p = 3.66e-09</i> | LR = 421.22,<br>p = 1.3e-08                  | <i>LR = 1509.92,<br/>p = 3.66e-09</i>                  | LR = 421.22,<br>p = 1.3e-08              |                               |
| <b>Internalizing, externalizing &amp; impulsivity/inattention</b> | LR = 789.54,<br>p = 8.96e-09   | <i>LR = 1931.14,<br/>p &lt; 2e-16</i> | indistinguishable                            | <i>LR = 1931.14,<br/>p &lt; 2e-16</i>                  |                                          |                               |
| <b>Internalizing &amp; externalizing</b>                          | LR = 2720.68,<br>p = 1.33e-08  | indistinguishable                     | LR = 1931.14,<br>p < 2e-16                   |                                                        |                                          |                               |
| <b>Hierarchical model &amp; impulsivity/inattention</b>           | LR = 789.54,<br>p = 8.96e-09   | <i>LR = 1931.14,<br/>p &lt; 2e-16</i> |                                              |                                                        |                                          |                               |
| <b>Hierarchical model</b>                                         | LR = 2720.68,<br>p = 1.33e-08  |                                       |                                              |                                                        |                                          |                               |

Supplementary Table S8. Unstandardized and standardized estimates, Z scores, P values and confidence limits (CL) for the latent variables of the SEM model. All P-values are corrected for false discovery rate. Significant (<0.05) P-values are in bold. CL = confidence limit.

| Latent variable         | Observed variable                  | Unstand-ardized estimate | Stand-ardized estimate | Z-score | P-value        | Lower 95% CL | Upper 95% CL |
|-------------------------|------------------------------------|--------------------------|------------------------|---------|----------------|--------------|--------------|
| Fear-aggression         | Fearfulness score                  | 1.000                    | 0.409                  | 21.01   | < <b>0.001</b> | 0.371        | 0.447        |
|                         | Barking score                      | 1.841                    | 0.816                  | 81.51   | < <b>0.001</b> | 0.796        | 0.835        |
|                         | Stranger directed aggression score | 1.222                    | 0.561                  | 40.49   | < <b>0.001</b> | 0.534        | 0.588        |
| Fear-related behavior   | Noise sensitivity score            | 1.000                    | 0.399                  | 32.83   | < <b>0.001</b> | 0.375        | 0.422        |
|                         | Separation-related behavior score  | 0.542                    | 0.225                  | 15.20   | < <b>0.001</b> | 0.196        | 0.254        |
|                         | Fear of surfaces/heights score     | 0.733                    | 0.310                  | 23.35   | < <b>0.001</b> | 0.284        | 0.336        |
|                         | Fearfulness score                  | 1.375                    | 0.590                  | 47.88   | < <b>0.001</b> | 0.566        | 0.614        |
| Aggression              | Owner directed aggression score    | 1.000                    | 0.313                  | 22.25   | < <b>0.001</b> | 0.286        | 0.341        |
|                         | Dog directed aggression score      | 2.400                    | 0.740                  | 59.59   | < <b>0.001</b> | 0.716        | 0.765        |
|                         | Stranger directed aggression score | 0.756                    | 0.239                  | 16.79   | < <b>0.001</b> | 0.211        | 0.266        |
| Impulsivity/inattention | Inattention score                  | 1.000                    | 0.700                  | 78.63   | < <b>0.001</b> | 0.682        | 0.717        |
|                         | Hyperactivity/impulsivity score    | 1.143                    | 0.808                  | 101.52  | < <b>0.001</b> | 0.793        | 0.824        |

Supplementary Table S9. Unstandardized and standardized estimates, Z scores, P values and confidence limits (CL) for the regressions of the SEM model. All P-values are corrected for false discovery rate. Significant (<0.05) P-values are in bold. CL = confidence limit.

| Outcome variable      | Explanatory variable           | Unstand-ardized estimate | Stand-ardized estimate | Z-score | P-value        | Lower 95% CL | Upper 95% CL |
|-----------------------|--------------------------------|--------------------------|------------------------|---------|----------------|--------------|--------------|
| Fear-related behavior | Insecurity score               | 0.383                    | 0.824                  | 60.23   | < <b>0.001</b> | 0.797        | 0.851        |
|                       | Aggressiveness/dominance score | -0.037                   | -0.080                 | -5.83   | < <b>0.001</b> | -0.107       | -0.053       |
|                       | Perseverance score             | -0.008                   | -0.017                 | -1.46   | 0.155          | -0.041       | 0.006        |
|                       | Training focus score           | -0.002                   | -0.004                 | -0.26   | 0.810          | -0.031       | 0.024        |
|                       | Energy score                   | -0.035                   | -0.077                 | -6.77   | < <b>0.001</b> | -0.099       | -0.054       |
|                       | Human sociability score        | 0.015                    | 0.032                  | 2.38    | <b>0.019</b>   | 0.006        | 0.058        |
|                       | Dog sociability score          | -0.047                   | -0.100                 | -8.06   | < <b>0.001</b> | -0.125       | -0.076       |
| Fear-aggression       | Insecurity score               | 0.250                    | 0.565                  | 49.70   | < <b>0.001</b> | 0.542        | 0.587        |
|                       | Aggressiveness/dominance score | 0.090                    | 0.203                  | 16.97   | < <b>0.001</b> | 0.180        | 0.227        |
|                       | Perseverance score             | 0.084                    | 0.189                  | 19.43   | < <b>0.001</b> | 0.170        | 0.208        |
|                       | Training focus score           | 0.053                    | 0.121                  | 11.14   | < <b>0.001</b> | 0.100        | 0.143        |
|                       | Energy score                   | 0.014                    | 0.032                  | 3.14    | <b>0.002</b>   | 0.012        | 0.051        |
|                       | Human sociability score        | -0.089                   | -0.203                 | -17.10  | < <b>0.001</b> | -0.226       | -0.180       |
|                       | Dog sociability score          | 0.019                    | 0.042                  | 3.70    | < <b>0.001</b> | 0.020        | 0.064        |
| Aggression            | Insecurity score               | 0.045                    | 0.149                  | 12.74   | < <b>0.001</b> | 0.126        | 0.172        |
|                       | Aggressiveness/dominance score | 0.256                    | 0.836                  | 60.10   | < <b>0.001</b> | 0.809        | 0.864        |
|                       | Perseverance score             | 0.001                    | 0.002                  | 0.17    | 0.869          | -0.019       | 0.022        |

|                                    |                                         |        |        |        |                  |        |        |
|------------------------------------|-----------------------------------------|--------|--------|--------|------------------|--------|--------|
|                                    | Training focus score                    | -0.009 | -0.031 | -2.83  | <b>0.006</b>     | -0.053 | -0.010 |
|                                    | Energy score                            | 0.001  | 0.002  | 0.20   | 0.853            | -0.018 | 0.022  |
|                                    | Human sociability score                 | 0.002  | 0.007  | 0.64   | 0.540            | -0.014 | 0.028  |
|                                    | Dog sociability score                   | -0.019 | -0.061 | -5.41  | <b>&lt;0.001</b> | -0.083 | -0.039 |
| Impulsivity/<br>inattention        | Insecurity score                        | 0.076  | 0.111  | 11.82  | <b>&lt;0.001</b> | 0.093  | 0.130  |
|                                    | Aggressiveness/dominance score          | -0.019 | -0.028 | -2.81  | <b>0.006</b>     | -0.047 | -0.008 |
|                                    | Perseverance score                      | 0.032  | 0.046  | 5.20   | <b>&lt;0.001</b> | 0.029  | 0.064  |
|                                    | Training focus score                    | -0.525 | -0.771 | -76.71 | <b>&lt;0.001</b> | -0.791 | -0.752 |
|                                    | Energy score                            | 0.194  | 0.284  | 22.40  | <b>&lt;0.001</b> | 0.259  | 0.309  |
|                                    | Human sociability score                 | 0.024  | 0.036  | 4.26   | <b>&lt;0.001</b> | 0.019  | 0.053  |
|                                    | Dog sociability score                   | -0.026 | -0.037 | -3.71  | <b>&lt;0.001</b> | -0.057 | -0.018 |
| Noise sensitivity score            | Sex                                     | -0.015 | -0.007 | -0.72  | 0.490            | -0.024 | 0.011  |
|                                    | Age                                     | 0.054  | 0.160  | 16.03  | <b>&lt;0.001</b> | 0.140  | 0.179  |
|                                    | Socialization                           | 0.024  | 0.020  | 1.91   | 0.062            | 0.000  | 0.041  |
|                                    | Noise sensitivity breed mean            | 0.756  | 0.160  | 17.18  | <b>&lt;0.001</b> | 0.142  | 0.178  |
| Fearfulness score                  | Sex                                     | 0.078  | 0.036  | 5.76   | <b>&lt;0.001</b> | 0.024  | 0.049  |
|                                    | Age                                     | -0.013 | -0.040 | -5.54  | <b>&lt;0.001</b> | -0.055 | -0.026 |
|                                    | Socialization                           | -0.024 | -0.022 | -3.13  | <b>0.002</b>     | -0.036 | -0.008 |
|                                    | Fearfulness breed mean                  | 0.498  | 0.108  | 17.08  | <b>&lt;0.001</b> | 0.095  | 0.120  |
| Barking score                      | Sex                                     | 0.002  | 0.001  | 0.14   | 0.887            | -0.014 | 0.016  |
|                                    | Age                                     | 0.015  | 0.052  | 5.88   | <b>&lt;0.001</b> | 0.035  | 0.070  |
|                                    | Socialization                           | -0.072 | -0.072 | -8.64  | <b>&lt;0.001</b> | -0.088 | -0.056 |
|                                    | Barking breed mean                      | 1.181  | 0.214  | 30.42  | <b>&lt;0.001</b> | 0.201  | 0.228  |
| Owner directed aggression score    | Sex                                     | -0.061 | -0.031 | -3.40  | <b>0.001</b>     | -0.049 | -0.013 |
|                                    | Age                                     | -0.009 | -0.032 | -2.95  | <b>0.003</b>     | -0.052 | -0.011 |
|                                    | Socialization                           | -0.035 | -0.036 | -3.33  | <b>0.001</b>     | -0.058 | -0.015 |
|                                    | Owner directed aggression breed mean    | 0.633  | 0.172  | 19.73  | <b>&lt;0.001</b> | 0.155  | 0.189  |
| Stranger directed aggression score | Sex                                     | -0.055 | -0.029 | -3.54  | <b>&lt;0.001</b> | -0.044 | -0.013 |
|                                    | Age                                     | 0.009  | 0.033  | 3.51   | <b>&lt;0.001</b> | 0.014  | 0.051  |
|                                    | Socialization                           | -0.020 | -0.021 | -2.13  | <b>0.037</b>     | -0.040 | -0.002 |
|                                    | Stranger directed aggression breed mean | 0.454  | 0.091  | 11.58  | <b>&lt;0.001</b> | 0.076  | 0.107  |
| Dog directed aggression score      | Sex                                     | -0.018 | -0.009 | -1.31  | 0.205            | -0.023 | 0.004  |
|                                    | Age                                     | 0.022  | 0.077  | 9.11   | <b>&lt;0.001</b> | 0.060  | 0.093  |
|                                    | Socialization                           | -0.011 | -0.012 | -1.47  | 0.155            | -0.027 | 0.004  |
|                                    | Dog directed aggression breed mean      | 0.424  | 0.088  | 12.69  | <b>&lt;0.001</b> | 0.074  | 0.101  |
| Fear of surfaces/heights score     | Sex                                     | -0.085 | -0.039 | -3.95  | <b>&lt;0.001</b> | -0.058 | -0.020 |
|                                    | Age                                     | 0.031  | 0.096  | 9.46   | <b>&lt;0.001</b> | 0.076  | 0.116  |
|                                    | Socialization                           | 0.049  | 0.045  | 3.92   | <b>&lt;0.001</b> | 0.022  | 0.067  |
|                                    | Fear of surfaces/heights breed mean     | 1.258  | 0.187  | 15.90  | <b>&lt;0.001</b> | 0.164  | 0.210  |
| Separation-related behavior score  | Sex                                     | -0.184 | -0.082 | -8.62  | <b>&lt;0.001</b> | -0.101 | -0.063 |
|                                    | Age                                     | -0.016 | -0.048 | -4.68  | <b>&lt;0.001</b> | -0.069 | -0.028 |

|                                        |                                           |        |        |        |                  |        |        |
|----------------------------------------|-------------------------------------------|--------|--------|--------|------------------|--------|--------|
|                                        | Socialization                             | 0.022  | 0.019  | 1.79   | 0.081            | -0.002 | 0.041  |
|                                        | Separation-related behavior<br>breed mean | 0.937  | 0.171  | 17.12  | <b>&lt;0.001</b> | 0.151  | 0.190  |
| Inattention<br>score                   | Sex                                       | -0.053 | -0.027 | -3.47  | <b>0.001</b>     | -0.043 | -0.012 |
|                                        | Age                                       | 0.013  | 0.044  | 5.15   | <b>&lt;0.001</b> | 0.027  | 0.061  |
|                                        | Socialization                             | 0.007  | 0.007  | 0.77   | 0.460            | -0.011 | 0.026  |
|                                        | Inattention breed mean                    | 0.673  | 0.155  | 19.97  | <b>&lt;0.001</b> | 0.140  | 0.170  |
| Hyperactivity/<br>impulsivity<br>score | Sex                                       | -0.030 | -0.016 | -2.20  | <b>0.031</b>     | -0.030 | -0.002 |
|                                        | Age                                       | 0.003  | 0.010  | 1.12   | 0.276            | -0.007 | 0.026  |
|                                        | Socialization                             | -0.002 | -0.002 | -0.28  | 0.800            | -0.018 | 0.013  |
|                                        | Hyperactivity/impulsivity breed<br>mean   | 0.517  | 0.082  | 11.15  | <b>&lt;0.001</b> | 0.067  | 0.096  |
| Insecurity score                       | Sex                                       | 0.088  | 0.044  | 4.82   | <b>&lt;0.001</b> | 0.026  | 0.062  |
|                                        | Age                                       | -0.016 | -0.056 | -6.28  | <b>&lt;0.001</b> | -0.074 | -0.039 |
|                                        | Socialization                             | -0.148 | -0.149 | -13.75 | <b>&lt;0.001</b> | -0.170 | -0.127 |
|                                        | Insecurity breed mean                     | 0.870  | 0.215  | 25.06  | <b>&lt;0.001</b> | 0.198  | 0.232  |
| Aggressiveness/<br>dominance<br>score  | Sex                                       | -0.194 | -0.097 | -10.98 | <b>&lt;0.001</b> | -0.115 | -0.080 |
|                                        | Age                                       | 0.049  | 0.170  | 19.34  | <b>&lt;0.001</b> | 0.153  | 0.188  |
|                                        | Socialization                             | -0.079 | -0.079 | -7.58  | <b>&lt;0.001</b> | -0.100 | -0.059 |
|                                        | Aggressiveness/dominance<br>breed mean    | 1.226  | 0.278  | 36.13  | <b>&lt;0.001</b> | 0.262  | 0.293  |
| Perseverance<br>score                  | Sex                                       | 0.014  | 0.007  | 0.79   | 0.450            | -0.011 | 0.025  |
|                                        | Age                                       | -0.017 | -0.060 | -6.41  | <b>&lt;0.001</b> | -0.078 | -0.041 |
|                                        | Socialization                             | 0.052  | 0.053  | 4.97   | <b>&lt;0.001</b> | 0.032  | 0.074  |
|                                        | Perseverance breed mean                   | 1.120  | 0.227  | 25.58  | <b>&lt;0.001</b> | 0.209  | 0.244  |
| Training focus<br>score                | Sex                                       | 0.130  | 0.064  | 7.08   | <b>&lt;0.001</b> | 0.047  | 0.082  |
|                                        | Age                                       | 0.039  | 0.133  | 15.29  | <b>&lt;0.001</b> | 0.116  | 0.151  |
|                                        | Socialization                             | 0.111  | 0.111  | 10.21  | <b>&lt;0.001</b> | 0.089  | 0.132  |
|                                        | Training focus breed mean                 | 0.883  | 0.191  | 22.92  | <b>&lt;0.001</b> | 0.175  | 0.207  |
| Energy score                           | Sex                                       | -0.067 | -0.033 | -4.02  | <b>&lt;0.001</b> | -0.049 | -0.017 |
|                                        | Age                                       | -0.096 | -0.329 | -41.39 | <b>&lt;0.001</b> | -0.344 | -0.313 |
|                                        | Socialization                             | -0.037 | -0.037 | -3.75  | <b>&lt;0.001</b> | -0.057 | -0.018 |
|                                        | Energy breed mean                         | 1.729  | 0.348  | 44.89  | <b>&lt;0.001</b> | 0.333  | 0.363  |
| Human<br>sociability<br>score          | Sex                                       | 0.055  | 0.027  | 3.03   | <b>0.002</b>     | 0.010  | 0.045  |
|                                        | Age                                       | -0.030 | -0.103 | -11.48 | <b>&lt;0.001</b> | -0.121 | -0.085 |
|                                        | Socialization                             | 0.077  | 0.076  | 7.29   | <b>&lt;0.001</b> | 0.056  | 0.097  |
|                                        | Human sociability breed mean              | 1.649  | 0.224  | 24.03  | <b>&lt;0.001</b> | 0.206  | 0.242  |
| Dog sociability<br>score               | Sex                                       | -0.215 | -0.108 | -13.66 | <b>&lt;0.001</b> | -0.123 | -0.092 |
|                                        | Age                                       | -0.131 | -0.452 | -60.62 | <b>&lt;0.001</b> | -0.467 | -0.438 |
|                                        | Socialization                             | 0.058  | 0.059  | 6.37   | <b>&lt;0.001</b> | 0.041  | 0.077  |
|                                        | Dog sociability breed mean                | 0.904  | 0.184  | 25.49  | <b>&lt;0.001</b> | 0.170  | 0.199  |

Supplementary Table S10. Standardized estimates, Z scores, P values and confidence limits (CL) for the covariances of the SEM model. All P-values are corrected for false discovery rate. Significant (<0.05) P-values are in bold. CL = confidence limit.

| Variable 1                     | Variable 2                     | Unstandardized estimate | Standardized estimate | Z-score | P-value          | Lower 95% CL | Upper 95% CL |
|--------------------------------|--------------------------------|-------------------------|-----------------------|---------|------------------|--------------|--------------|
| Insecurity score               | Training focus score           | -0.280                  | -0.302                | -32.30  | <b>&lt;0.001</b> | -0.320       | -0.283       |
|                                | Aggressiveness/dominance score | 0.173                   | 0.194                 | 18.25   | <b>&lt;0.001</b> | 0.173        | 0.215        |
|                                | Dog sociability score          | -0.168                  | -0.206                | -21.92  | <b>&lt;0.001</b> | -0.225       | -0.188       |
|                                | Human sociability score        | -0.128                  | -0.138                | -12.49  | <b>&lt;0.001</b> | -0.159       | -0.116       |
| Aggressiveness/dominance score | Training focus score           | -0.195                  | -0.216                | -22.17  | <b>&lt;0.001</b> | -0.235       | -0.197       |
|                                | Energy score                   | 0.126                   | 0.155                 | 16.14   | <b>&lt;0.001</b> | 0.136        | 0.174        |
|                                | Dog sociability score          | -0.237                  | -0.301                | -33.40  | <b>&lt;0.001</b> | -0.319       | -0.283       |
|                                | Human sociability score        | -0.061                  | -0.068                | -6.66   | <b>&lt;0.001</b> | -0.088       | -0.048       |
| Training focus score           | Dog sociability score          | 0.024                   | 0.030                 | 3.09    | <b>0.002</b>     | 0.011        | 0.049        |
|                                | Human sociability score        | 0.144                   | 0.154                 | 15.19   | <b>&lt;0.001</b> | 0.134        | 0.173        |
| Energy score                   | Dog sociability score          | 0.088                   | 0.118                 | 11.90   | <b>&lt;0.001</b> | 0.099        | 0.138        |
|                                | Human sociability score        | 0.142                   | 0.166                 | 16.73   | <b>&lt;0.001</b> | 0.147        | 0.186        |
| Fear-aggression                | Fear-related behavior          | -0.021                  | -0.255                | -6.27   | <b>&lt;0.001</b> | -0.335       | -0.175       |
|                                | Aggression                     | 0.017                   | 0.405                 | 8.80    | <b>&lt;0.001</b> | 0.314        | 0.495        |
|                                | Impulsivity/inattention        | 0.004                   | 0.039                 | 1.95    | 0.058            | 0.000        | 0.079        |
| Fear-related behavior          | Aggression                     | 0.004                   | 0.111                 | 2.43    | <b>0.017</b>     | 0.021        | 0.201        |
|                                | Impulsivity/inattention        | 0.028                   | 0.309                 | 9.65    | <b>&lt;0.001</b> | 0.246        | 0.371        |
| Aggression                     | Impulsivity/inattention        | 0.009                   | 0.198                 | 5.39    | <b>&lt;0.001</b> | 0.126        | 0.270        |

Supplementary Table S11. Standardized estimates, Z scores, P values and confidence limits (CL) for the intercepts and variances of the SEM model. All P-values are corrected for false discovery rate. Significant (<0.05) P-values are in bold. CL = confidence limit.

| Intercepts                         |                         |                       |         |         |              |              |  |
|------------------------------------|-------------------------|-----------------------|---------|---------|--------------|--------------|--|
| Variable                           | Unstandardized estimate | Standardized estimate | Z-score | P-value | Lower 95% CL | Upper 95% CL |  |
| Fearfulness score                  | -0.282                  | -0.261                | -9.89   | <0.001  | -0.313       | -0.209       |  |
| Barking score                      | -0.580                  | -0.581                | -18.00  | <0.001  | -0.645       | -0.518       |  |
| Stranger directed aggression score | -0.157                  | -0.163                | -4.82   | <0.001  | -0.229       | -0.097       |  |
| Noise sensitivity score            | -0.589                  | -0.506                | -14.42  | <0.001  | -0.575       | -0.437       |  |
| Separation-related behavior score  | 0.052                   | 0.047                 | 1.30    | 0.207   | -0.024       | 0.117        |  |
| Fear of surfaces/heights score     | -0.472                  | -0.431                | -10.25  | <0.001  | -0.514       | -0.349       |  |
| Owner directed aggression score    | -0.140                  | -0.144                | -3.98   | <0.001  | -0.215       | -0.073       |  |
| Dog directed aggression score      | -0.317                  | -0.322                | -10.36  | <0.001  | -0.382       | -0.261       |  |
| Inattention score                  | -0.342                  | -0.350                | -10.71  | <0.001  | -0.414       | -0.286       |  |
| Hyperactivity/impulsivity score    | -0.183                  | -0.189                | -5.99   | <0.001  | -0.251       | -0.127       |  |
| Insecurity score                   | -0.424                  | -0.425                | -12.60  | <0.001  | -0.491       | -0.359       |  |
| Aggressiveness/dominance score     | -0.536                  | -0.540                | -15.27  | <0.001  | -0.610       | -0.471       |  |
| Perseverance score                 | -0.406                  | -0.408                | -11.01  | <0.001  | -0.480       | -0.335       |  |

|                         |        |        |        |        |        |        |
|-------------------------|--------|--------|--------|--------|--------|--------|
| Training focus score    | -0.842 | -0.837 | -23.03 | <0.001 | -0.909 | -0.766 |
| Energy score            | -0.573 | -0.572 | -14.24 | <0.001 | -0.651 | -0.493 |
| Human sociability score | -1.031 | -1.023 | -18.52 | <0.001 | -1.132 | -0.915 |
| Dog sociability score   | 0.638  | 0.641  | 20.41  | <0.001 | 0.579  | 0.703  |
| Fear-aggression         | 0      | 0      |        |        | 0      | 0      |
| Fear-related behavior   | 0      | 0      |        |        | 0      | 0      |
| Aggression              | 0      | 0      |        |        | 0      | 0      |
| Impulsivity/inattention | 0      | 0      |        |        | 0      | 0      |

#### Variations

| Variable                           | Unstandardized estimate | Standardized estimate | Z-score | P-value | Lower 95% CL | Upper 95% CL |
|------------------------------------|-------------------------|-----------------------|---------|---------|--------------|--------------|
| Fearfulness score                  | 0.307                   | 0.263                 | 28.38   | <0.001  | 0.245        | 0.281        |
| Barking score                      | 0.223                   | 0.224                 | 14.49   | <0.001  | 0.194        | 0.255        |
| Stranger directed aggression score | 0.430                   | 0.464                 | 37.11   | <0.001  | 0.440        | 0.489        |
| Noise sensitivity score            | 1.049                   | 0.774                 | 76.13   | <0.001  | 0.754        | 0.793        |
| Separation-related behavior score  | 1.139                   | 0.910                 | 118.57  | <0.001  | 0.895        | 0.925        |
| Fear of surfaces/heights score     | 1.019                   | 0.849                 | 91.36   | <0.001  | 0.831        | 0.868        |
| Owner directed aggression score    | 0.808                   | 0.860                 | 94.04   | <0.001  | 0.842        | 0.878        |
| Dog directed aggression score      | 0.375                   | 0.387                 | 21.38   | <0.001  | 0.351        | 0.422        |
| Inattention score                  | 0.455                   | 0.476                 | 41.23   | <0.001  | 0.453        | 0.499        |
| Hyperactivity/impulsivity score    | 0.305                   | 0.326                 | 28.55   | <0.001  | 0.304        | 0.349        |
| Insecurity score                   | 0.922                   | 0.927                 | 188.41  | <0.001  | 0.917        | 0.937        |
| Aggressiveness/dominance score     | 0.864                   | 0.878                 | 159.74  | <0.001  | 0.867        | 0.888        |
| Perseverance score                 | 0.933                   | 0.941                 | 219.56  | <0.001  | 0.933        | 0.950        |
| Training focus score               | 0.937                   | 0.928                 | 197.76  | <0.001  | 0.918        | 0.937        |
| Energy score                       | 0.771                   | 0.768                 | 114.23  | <0.001  | 0.755        | 0.781        |
| Human sociability score            | 0.943                   | 0.930                 | 192.81  | <0.001  | 0.920        | 0.939        |
| Dog sociability score              | 0.719                   | 0.727                 | 101.93  | <0.001  | 0.713        | 0.741        |
| Fear-aggression                    | 0.106                   | 0.542                 | 36.20   | <0.001  | 0.512        | 0.571        |
| Fear-related behavior              | 0.065                   | 0.300                 | 14.60   | <0.001  | 0.260        | 0.340        |
| Aggression                         | 0.017                   | 0.180                 | 7.46    | <0.001  | 0.133        | 0.228        |
| Impulsivity/inattention            | 0.123                   | 0.264                 | 25.94   | <0.001  | 0.244        | 0.284        |
